# Supplementary material
Source: PubMed Central journal article supplement (PMC4875523)
Supplement: 13238_2013_3007_MOESM1_ESM.pdf [file 13238_2013_3007_MOESM1_ESM.pdf]

# Supplementary Figure 1

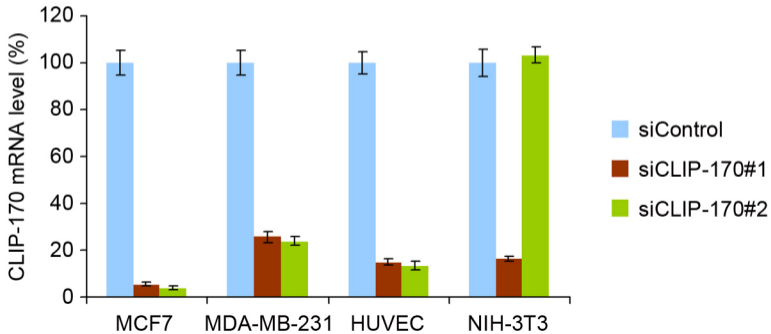

**Supplementary Figure 1. Examination of CLIP-170 mRNA expression.** MCF7, MDA-MB-231, HUVEC, and NIH-3T3 cells were transfected with CLIP-170 or control siRNAs for 72 hours, and quantitative real-time RT-PCR was performed to analyze CLIP-170 mRNA level. The data obtained were then normalized to the control group.
